# Supplementary material for: The transcriptional corepressor CtBP2 serves as a metabolite sensor orchestrating hepatic glucose and lipid homeostasis
Source: PubMed Central journal article supplement (PMC8563733; doi:10.1038/s41467-021-26638-5), 2021-11-02
Supplement: 41467_2021_26638_MOESM1_ESM.pdf [file 41467_2021_26638_MOESM1_ESM.pdf]

2 **Supplementary Information**

3

4 The transcriptional corepressor CtBP2 serves as a metabolite sensor  
5 orchestrating hepatic glucose and lipid homeostasis

6

7 Motohiro Sekiya, Kenta Kainoh, Takehito Sugasawa, Ryunosuke Yoshino,  
8 Takatsugu Hirokawa, Hiroaki Tokiwa, Shogo Nakano, Satoru Nagatoishi,  
9 Kouhei Tsumoto, Yoshinori Takeuchi, Takafumi Miyamoto, Takashi Matsuzaka,  
10 Hitoshi Shimano

11

12 **Additional information**

13 Supplementary Fig. 1-9

14 Supplementary Data 1, 2

15 Supplementary Table 1

16 Supplementary Movie 1,2

17

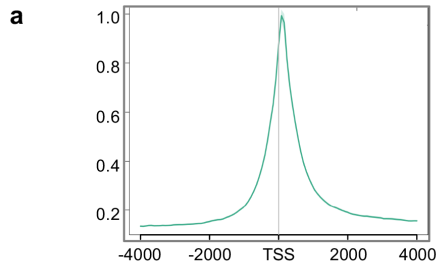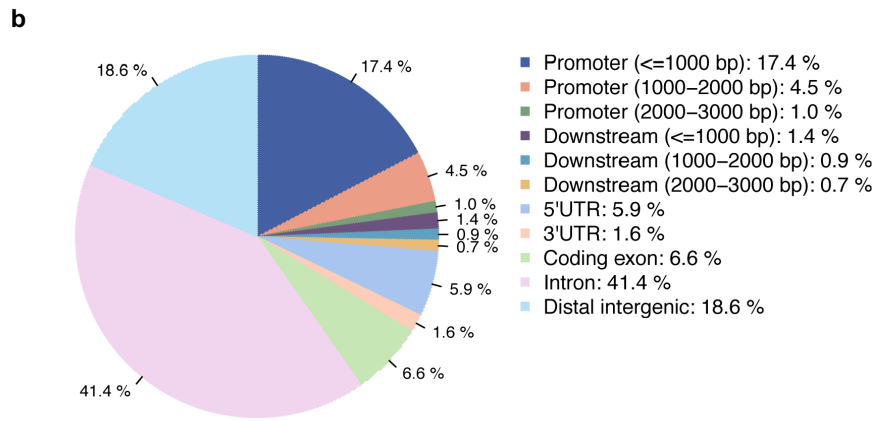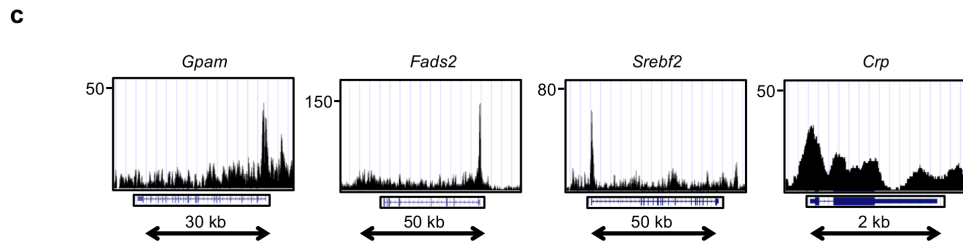

1

**d**

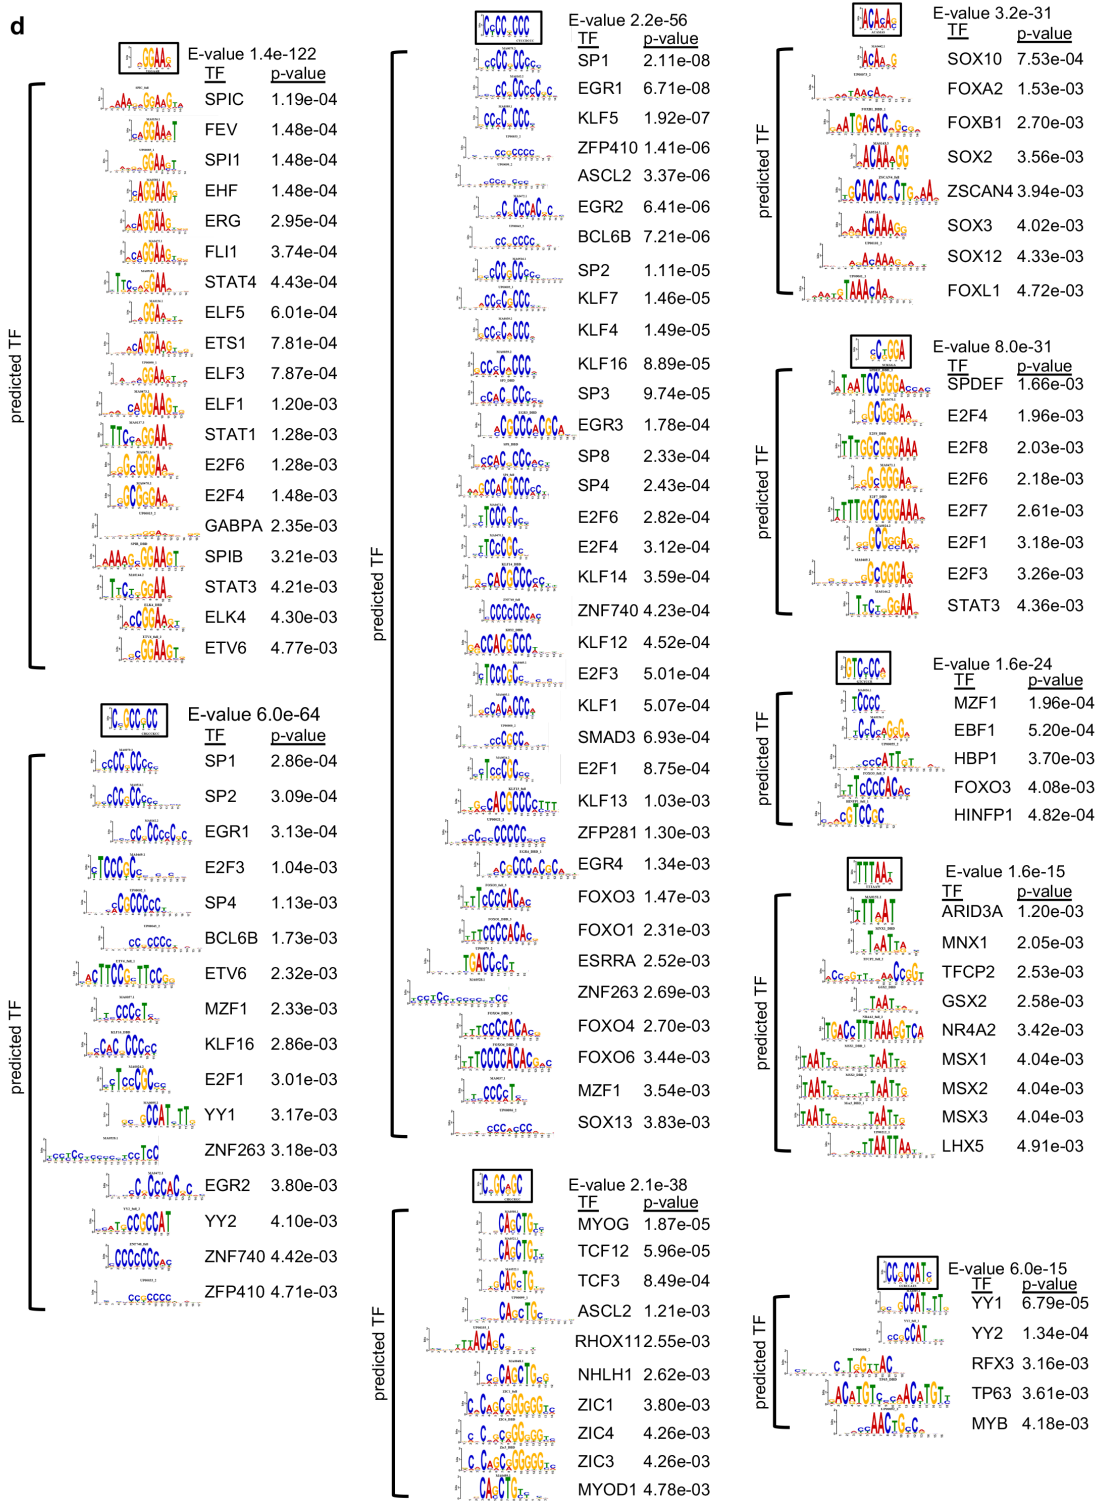

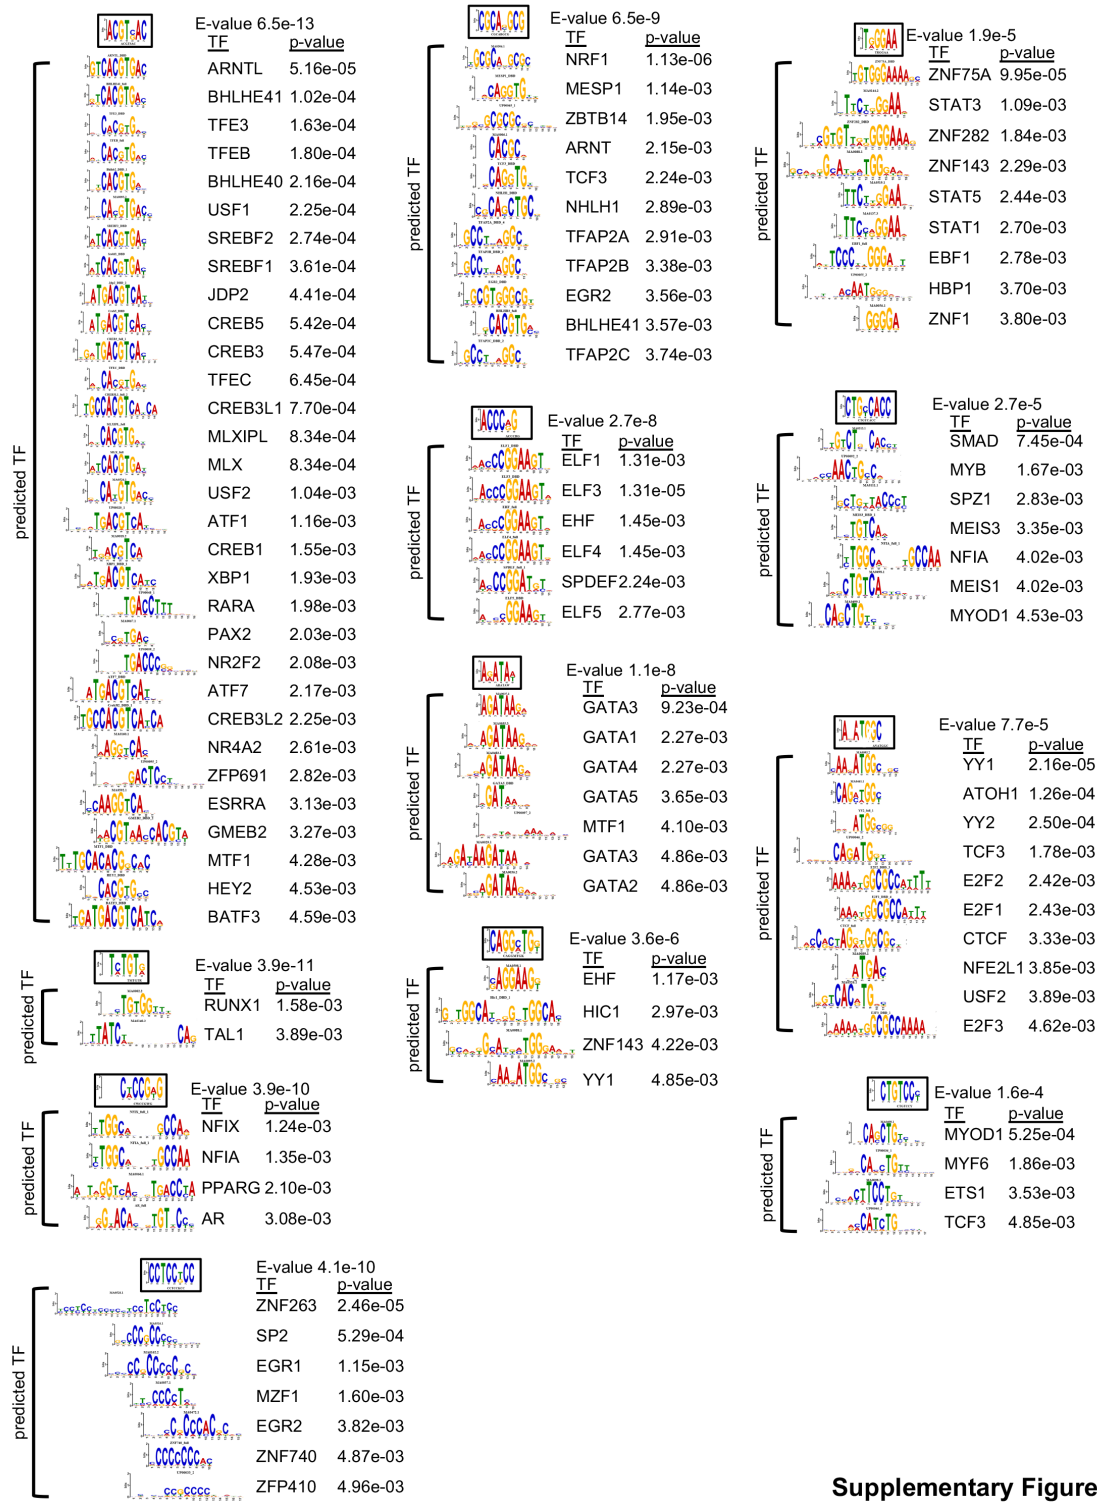

Supplementary Figure 1

- 1
- 2 **Supplementary Fig. 1. CtBP2 cistrome analyzed by ChIP-seq.**
- 3 **a,b.** Distribution of CtBP2 ChIP-seq peaks in normal liver tissues (6-h fasted)
- 4 relative to the TSSs (a) and percentage distribution of ChIP-seq peaks with

1 respect to gene features **(b)**. **c.** CtBP2 ChIP-seq peaks at representative  
2 metabolic gene loci. **d.** Motif analysis of CtBP2 ChIP-seq. The motifs enclosed  
3 by a rectangle are CtBP2-binding motifs enriched in the ChIP-seq. Prediction of  
4 known transcription factors targeted by CtBP2 based on sequence similarity are  
5 shown below <sup>85</sup>.

6

1

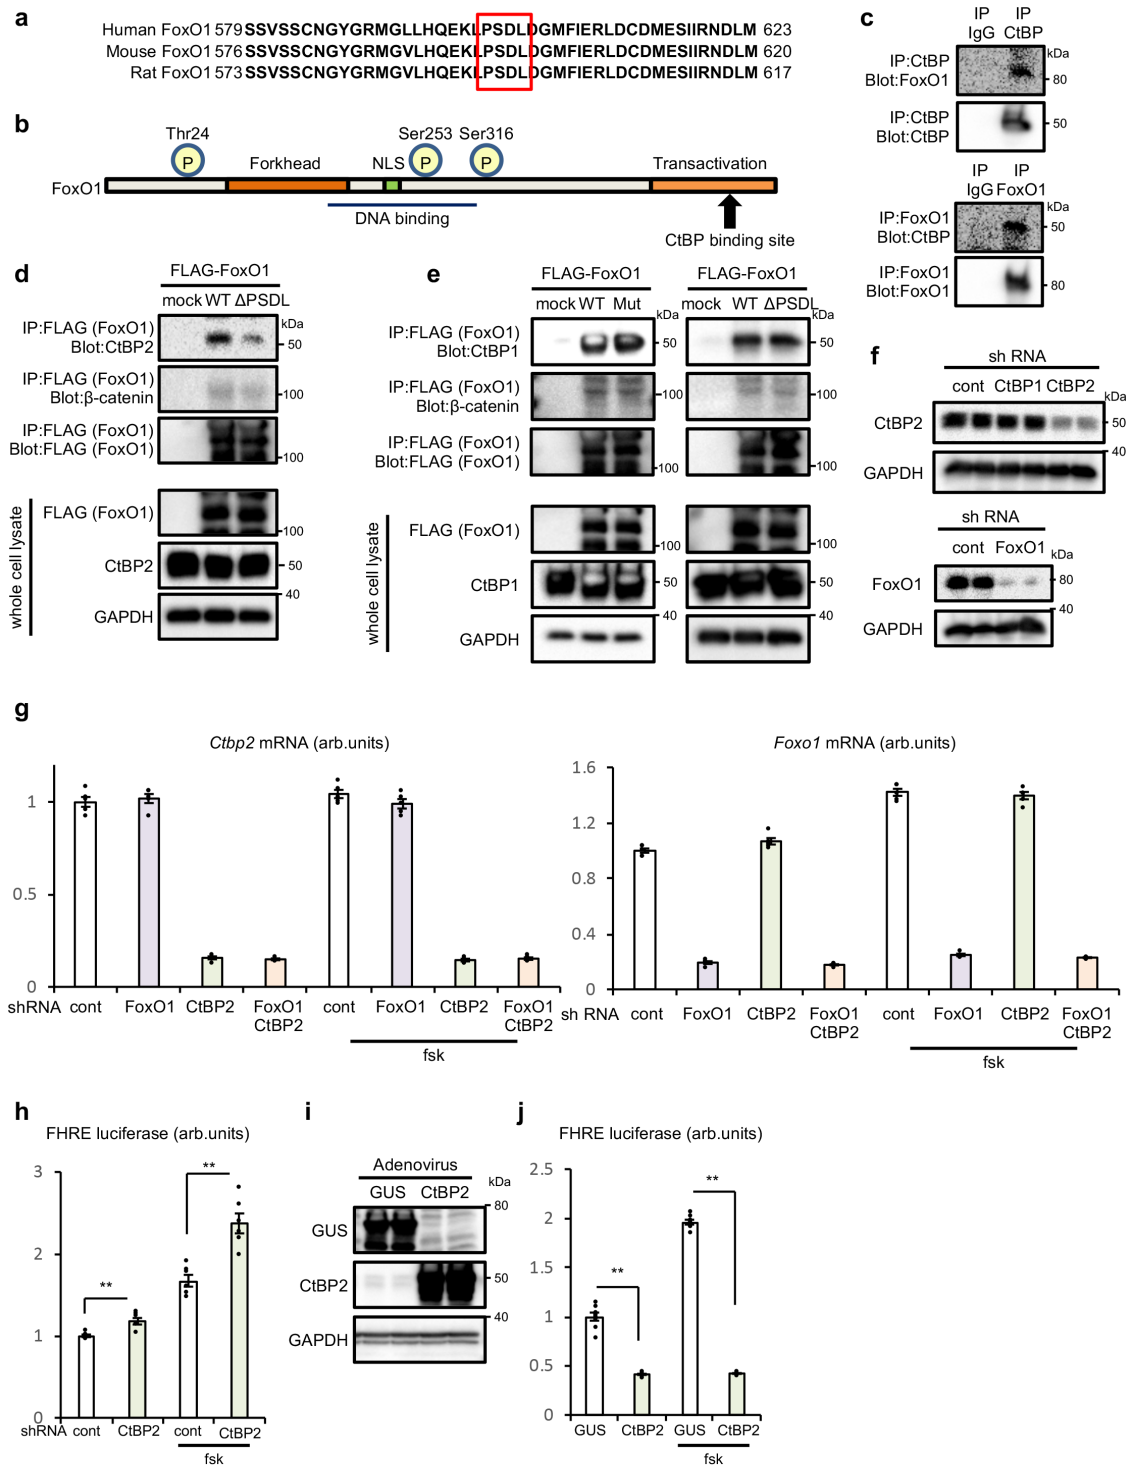

2

Supplementary Figure 2

3

Supplementary Fig. 2. Identification of CtBP2/FoxO1 complex as a

4

regulatory system for hepatic gluconeogenesis.

1 **a.** The conservation of a PSDL motif in FoxO1 sequences. The red rectangle  
2 indicates the location of the motif. **b.** Schematic description of CtBP-binding site  
3 in FoxO1. Three representative phosphorylation sites are shown (P). NLS:  
4 nuclear localization signal. **c.** Endogenous CtBPs/FoxO1 complex in primary  
5 hepatocytes. The CtBP antibody recognizes both CtBP1 and CtBP2 isoforms.  
6 **d,e.** HEK293 cells were transfected with either control plasmid, FLAG wild-type  
7 FoxO1 or mutant FLAG-FoxO1 (Mut: PSDL>PSAS,  $\Delta$ PSDL: PSDL motif  
8 deletion) along with CtBP1 or CtBP2 expression plasmid. The complexes were  
9 immunoprecipitated with FLAG magnetic beads. **d.** Deletion of the PSDL motif  
10 in FoxO1 diminishes CtBP2/FoxO1 interaction in HEK293 cells. **e.** Mutation or  
11 deletion of PSDL motif does not alter CtBP1/FoxO1 interaction. **f,g.** Knockdown  
12 efficiencies of shCtBP2 and shFoxO1 adenoviruses at protein (**f**) and mRNA (**g**,  
13 same experimental settings as described in Fig. 1e, n=5, biologically  
14 independent cells) levels. fsk: forskolin. **h.** FHRE luciferase activity following  
15 *CtBP2* knockdown (n=8, biologically independent cells, p-values are  $1.9 \times 10^{-3}$   
16 and  $5.8 \times 10^{-4}$  for sh-cont vs sh-*CtBP2* and sh-cont/fsk vs sh-*CtBP2*/fsk,  
17 respectively). **i.** Exogenous expression of GUS and CtBP2 at protein levels. **j.**  
18 FHRE luciferase activity (n=8, biologically independent cells, p-values are  
19  $1.2 \times 10^{-9}$  and  $2.1 \times 10^{-18}$  for GUS vs CtBP2 and GUS/fsk vs CtBP2/fsk,  
20 respectively) following CtBP2 overexpression. Data are expressed as the mean  
21  $\pm$  SEM. \*\* denotes  $p < 0.01$  evaluated by unpaired two-tailed Student's t-test.  
22 Source Data are provided as a Source Data file.

23

1

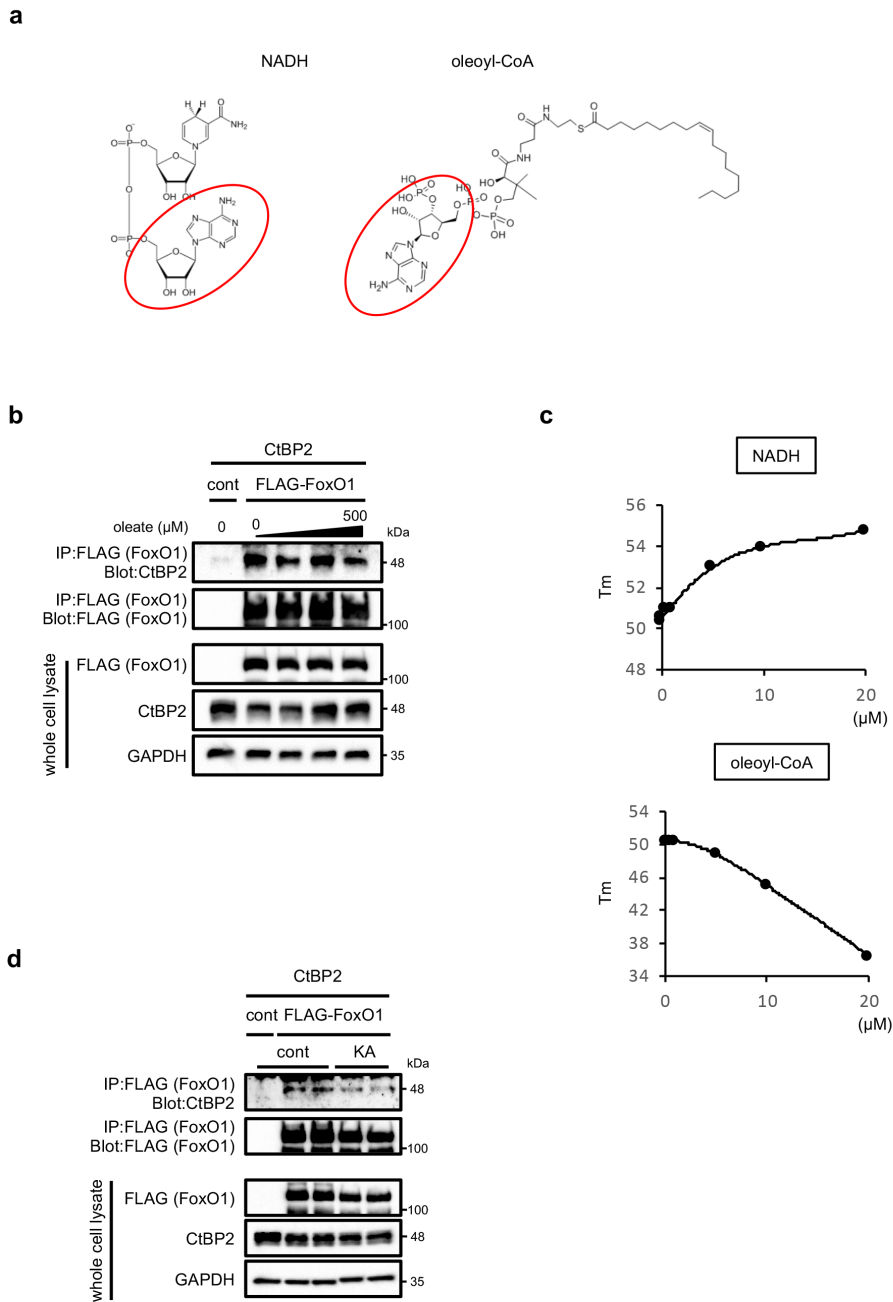

2

Supplementary Figure 3

3 **Supplementary Fig. 3. Metabolite-sensing capabilities of CtBP2.**

4 **a.** Structures of NADH and oleoyl-CoA. Adenosine structures are enclosed by

5 red ovals. **b.** CtBP2 does not respond to fatty acids. Increasing concentrations



1 of oleate (0, 50, 150, 500  $\mu$ M) were added to the HEK293 lysates. **c.** The  
2 metabolite concentration-dependent shift of melting temperatures ( $T_m$ ) in the  
3 DSF assay for a rough estimation of  $K_d$ . **d.** The effect of reduced NADH  
4 production by chemical inhibition of GAPDH. HEK293 cells transfected with  
5 FLAG-FoxO1 and CtBP2 were treated with 5  $\mu$ M koningic acid (KA, a GAPDH-  
6 specific inhibitor) for 5 h. Source Data are provided as a Source Data file.  
7

1

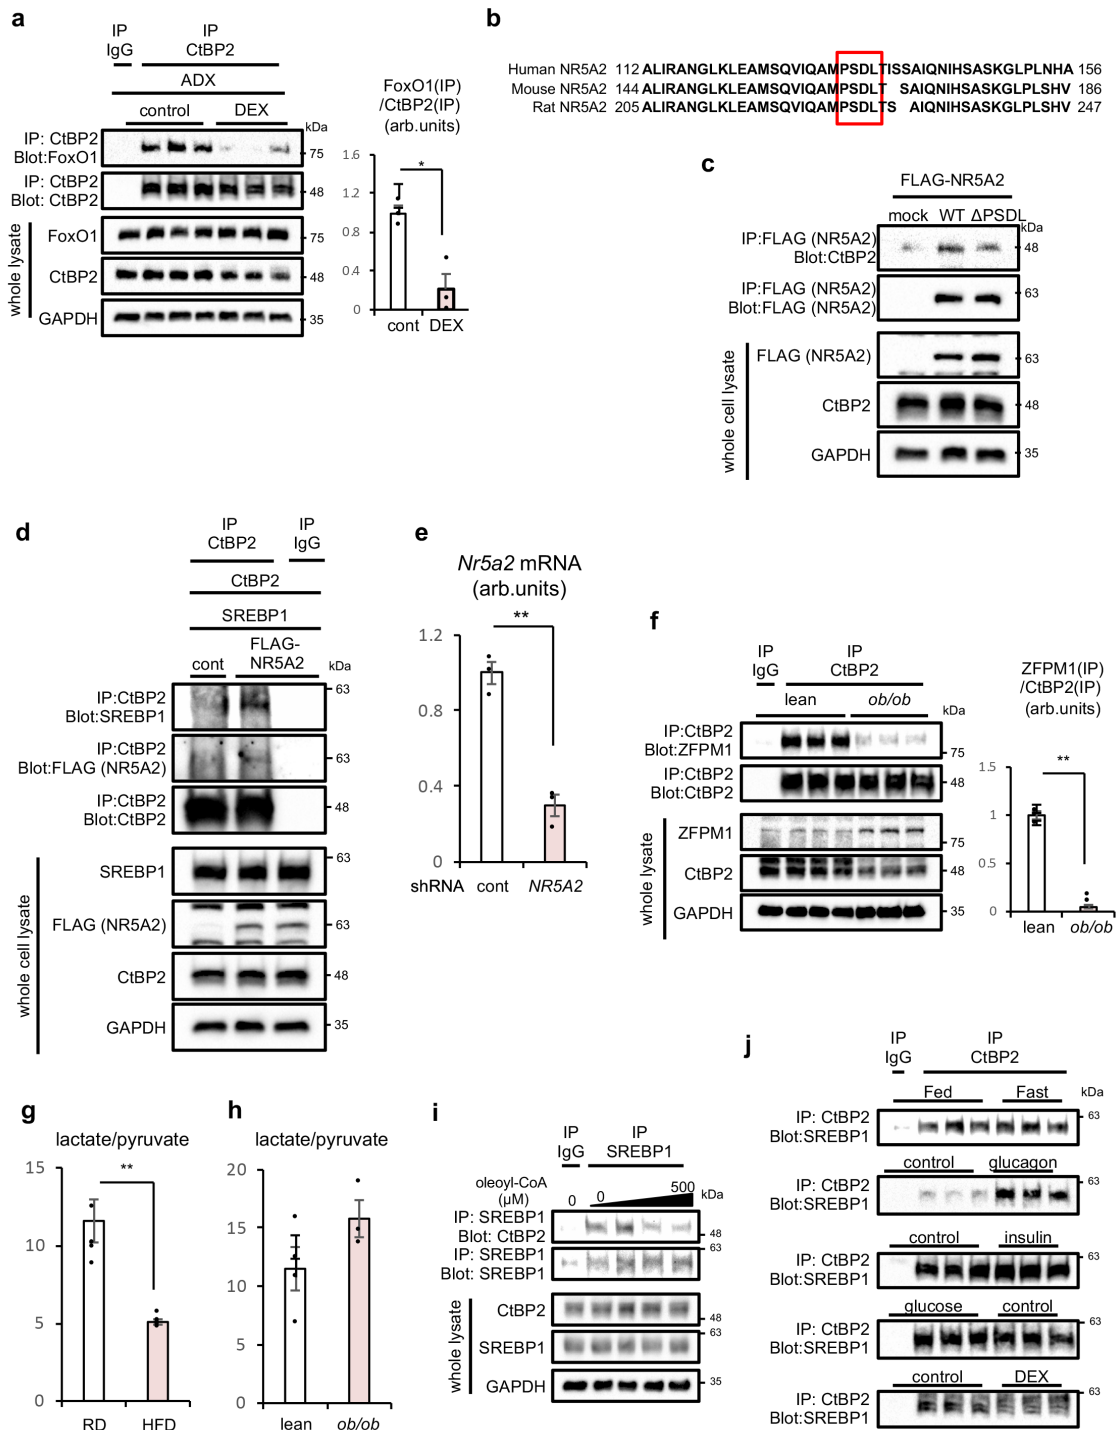

Supplementary Figure 4

2

3 **Supplementary Fig. 4. CtBP2 complex formation in vitro and in vivo.**

1 **a.** CtBP2/FoxO1 complex in response to glucocorticoid administration in  
2 adrenalectomized (ADX) mice (6 h following injection of 1 mg/kg of  
3 dexamethasone, DEX, fed ad libitum, n=3 or 4 biologically independent animals  
4 for each group as shown in the blot, p = 0.011). **b.** The conservation of a PSDL  
5 motif in NR5A2(LRH-1) sequences. The red rectangle indicates the location of  
6 the motif. **c.** HEK293 cells were transfected with either control plasmid, FLAG  
7 wild-type NR5A2(LRH-1) or mutant FLAG-NR5A2(LRH-1) ( $\Delta$ PSDL: PSDL motif  
8 deletion) along with CtBP2 expression plasmid. The complexes were  
9 immunoprecipitated with FLAG magnetic beads. **d.** HEK293 cells were  
10 transfected with either control plasmid, FLAG wild-type NR5A2(LRH-1),  
11 SREBP1 along with CtBP2 expression plasmid as indicated and  
12 immunoprecipitated with either control IgG or anti-CtBP2 antibody. **e.** mRNA  
13 expression levels of *Nr5a2* in Fig. 3I (n=3 biologically independent animals for  
14 each group, p =  $1.0 \times 10^{-3}$ ). **f.** Liver homogenates from genetically obese mice (6-  
15 h fasted) were subjected to co-immunoprecipitation to examine endogenous  
16 CtBP2/ZFPM1 complex. The densitometric quantification is shown to the right of  
17 the blot (n=3 or 4 biologically independent animals for each group as shown in  
18 the blot, p =  $5.9 \times 10^{-5}$ ). **g,h.** Lactate/pyruvate ratio indicating cytosolic  
19 NADH/NAD<sup>+</sup> ratio in the liver of lean control or diet-induced (HFD, **g**, p =  $1.6 \times 10^{-3}$ )/  
20 genetically (ob, **h**) obese mice (n=5 for RD and HFD, n=4 for lean and n=3  
21 for ob, biologically independent animals, 6-h fasted). **i.** The fatty acyl-CoA  
22 sensing capability of CtBP2/SREBP1 complex. Increasing concentrations of  
23 oleoyl-CoA (0, 50, 150, 500  $\mu$ M) were added to the liver lysates from normal  
24 mice. **j.** CtBP2/SREBP1 complex formation in response to physiological stimuli.

1 Experimental settings are same as described in Fig. 3a-d and Supplementary  
 2 Fig. 4a. Data are expressed as the mean  $\pm$  SEM. \* and \*\* denote  $p < 0.05$  and  $p$   
 3  $< 0.01$  evaluated by unpaired two-tailed Student's t-test, respectively. Source  
 4 Data are provided as a Source Data file.  
 5  
 6

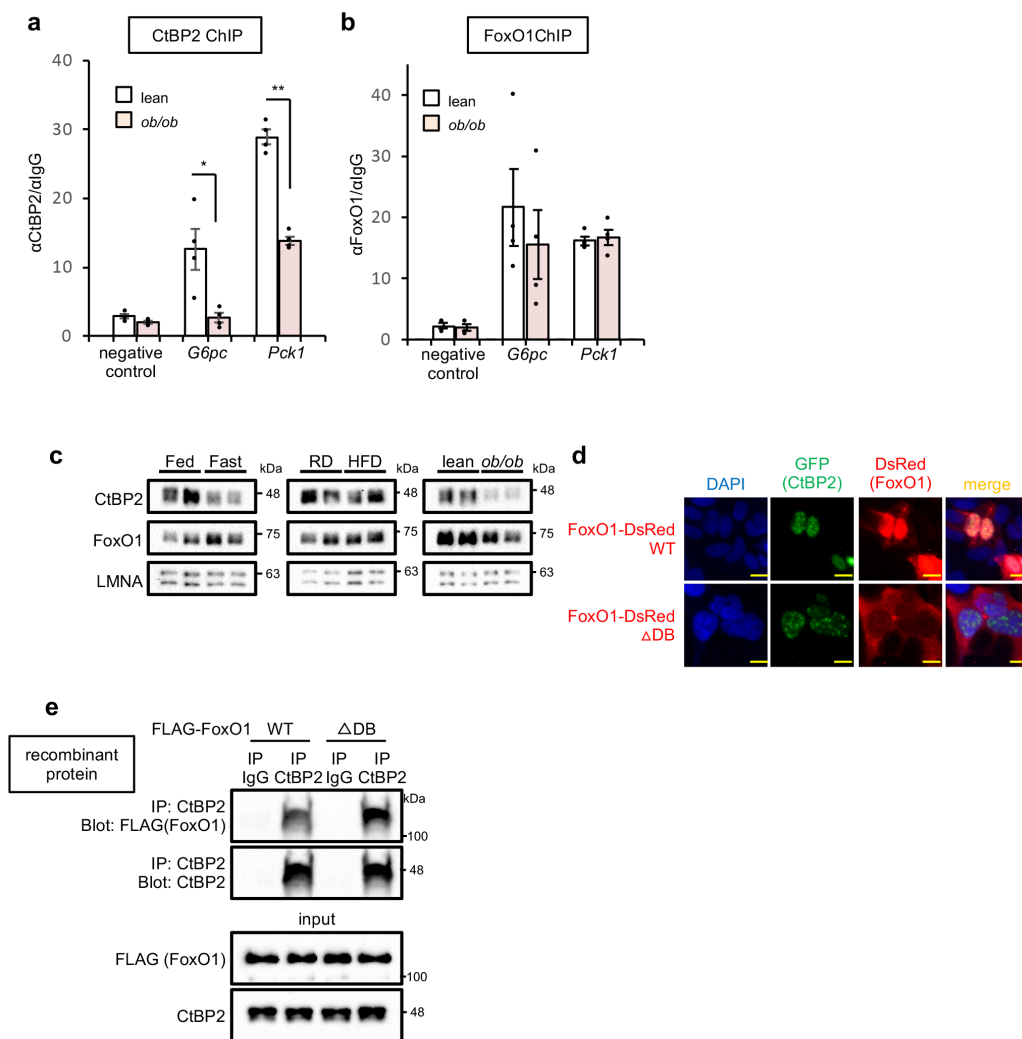

7

Supplementary Figure 5

1 **Supplementary Fig. 5. Dissociation of CtBP2 from FoxO1 occurs in the**  
2 **nucleus.**

3 **a,b.** CtBP2 (**a**,  $p = 0.018$  and  $1.9 \times 10^{-5}$  for *G6pc* and *Pck1*, respectively) and  
4 FoxO1 (**b**) recruitment to promoter regions of gluconeogenic genes ( $n=4$ ,  
5 biologically independent animals, 6-h fasted). *ob*: genetically obese mice. **c.**  
6 Liver nuclei were isolated from mice in different conditions (Fed: fed ad libitum,  
7 Fast: 24-h fast, RD: regular diet, HFD: diet-induced obesity, *ob/ob*: genetic  
8 obesity. Obese mice along with their control were fasted for 4-6 h). Expression  
9 levels of CtBP2 and FoxO1 in nuclei were determined. **d.** Either the wild-type  
10 FoxO1(WT)-DsRed or cytoplasmic FoxO1 mutant ( $\Delta$ DB)-DsRed was expressed  
11 in HEK293 cells along with CtBP2-GFP. The yellow bars indicate 10  $\mu$ m. **e.** The  
12 CtBP2/FoxO1 complex formation was analyzed using purified recombinant  
13 proteins in vitro. Either FLAG-wild-type (WT) FoxO1 protein or FLAG-FoxO1  
14 mutant ( $\Delta$ DB) protein was mixed with CtBP2 protein and immunoprecipitated  
15 with CtBP2 antibody. Data are expressed as the mean  $\pm$  SEM. \* and \*\* denote  
16  $p < 0.05$  and  $p < 0.01$  evaluated by unpaired two-tailed Student's t-test,  
17 respectively. Source Data are provided as a Source Data file.

18

1

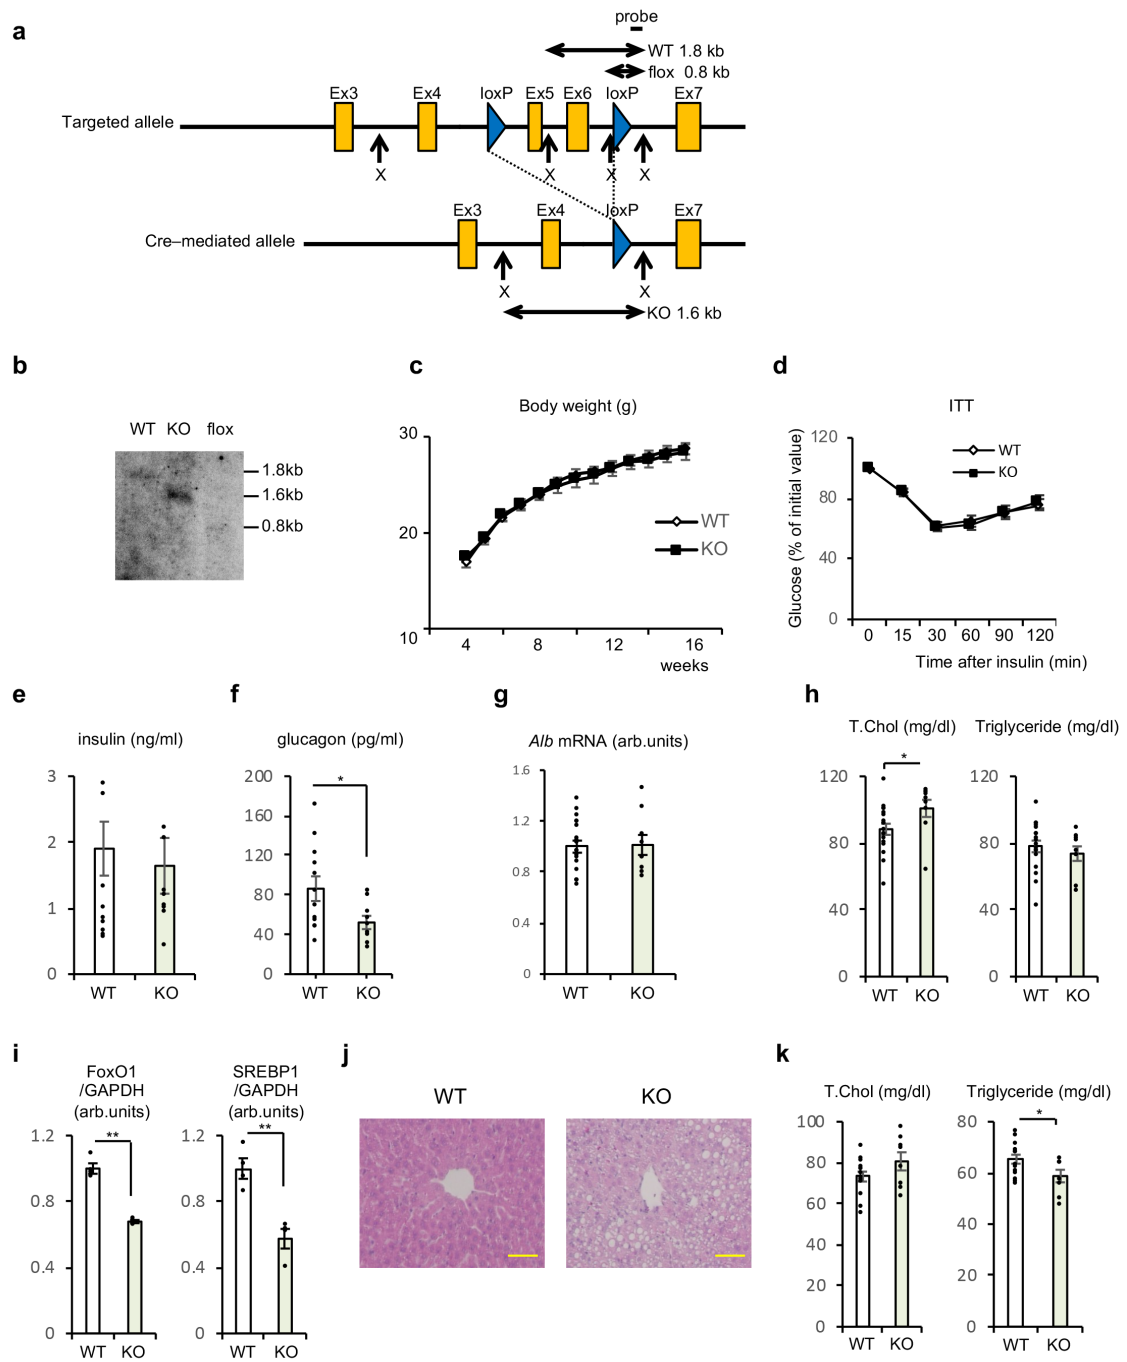

Supplementary Figure 6

2

3 **Supplementary Fig.6 CtBP2 deficiency in liver leads to obesity-associated**

4 **metabolic disturbances.**

1 **a.** The targeting strategy for CtBP2 flox mice. X: XbaI. **b.** Southern blot analysis.  
2 **c.** Body weight (n=10, biologically independent animals). **d.** Insulin tolerance  
3 test (ITT) (n=12 for WT and n=6 for KO, biologically independent animals, 6-h  
4 fast). **e,f.** Plasma insulin (**e**) and glucagon (**f**, p = 0.041) levels following a 6-h  
5 fast (n=12 for WT and n=9 for KO, biologically independent animals). **g.** The  
6 expression levels of *Alb* gene in the liver tissues of either wild-type (WT) or  
7 liver-specific CtBP2-knockout (KO) mice (n=19 for WT, n=9 for KO, biologically  
8 independent animals, 6-h fast). **h.** Plasma lipid profile (n=18 for WT, n=9 for KO,  
9 biologically independent animals, 6-h fast, p = 0.046 for T.Chol). **i.** Expression  
10 levels of FoxO1 and SREBP1. Blots shown in Fig. 5g were quantified (n=4  
11 biologically independent animals for each group, p =  $6.9 \times 10^{-5}$  and  $2.6 \times 10^{-3}$ ,  
12 respectively). **j.** Representative Hematoxylin and Eosin stained sections of liver  
13 samples from mice on an MCD diet for a week. Yellow bars indicate 100  $\mu$ m. **k.**  
14 Plasma lipid profile in mice on an MCD diet for a week (n=14 for WT and n=8  
15 for KO, 6-h fast, p = 0.039 for Triglyceride). Data are expressed as the mean  $\pm$   
16 SEM. \* and \*\* denote p < 0.05 and p < 0.01 evaluated by unpaired two-tailed  
17 Student's t-test, respectively. Source Data are provided as a Source Data file.  
18

1

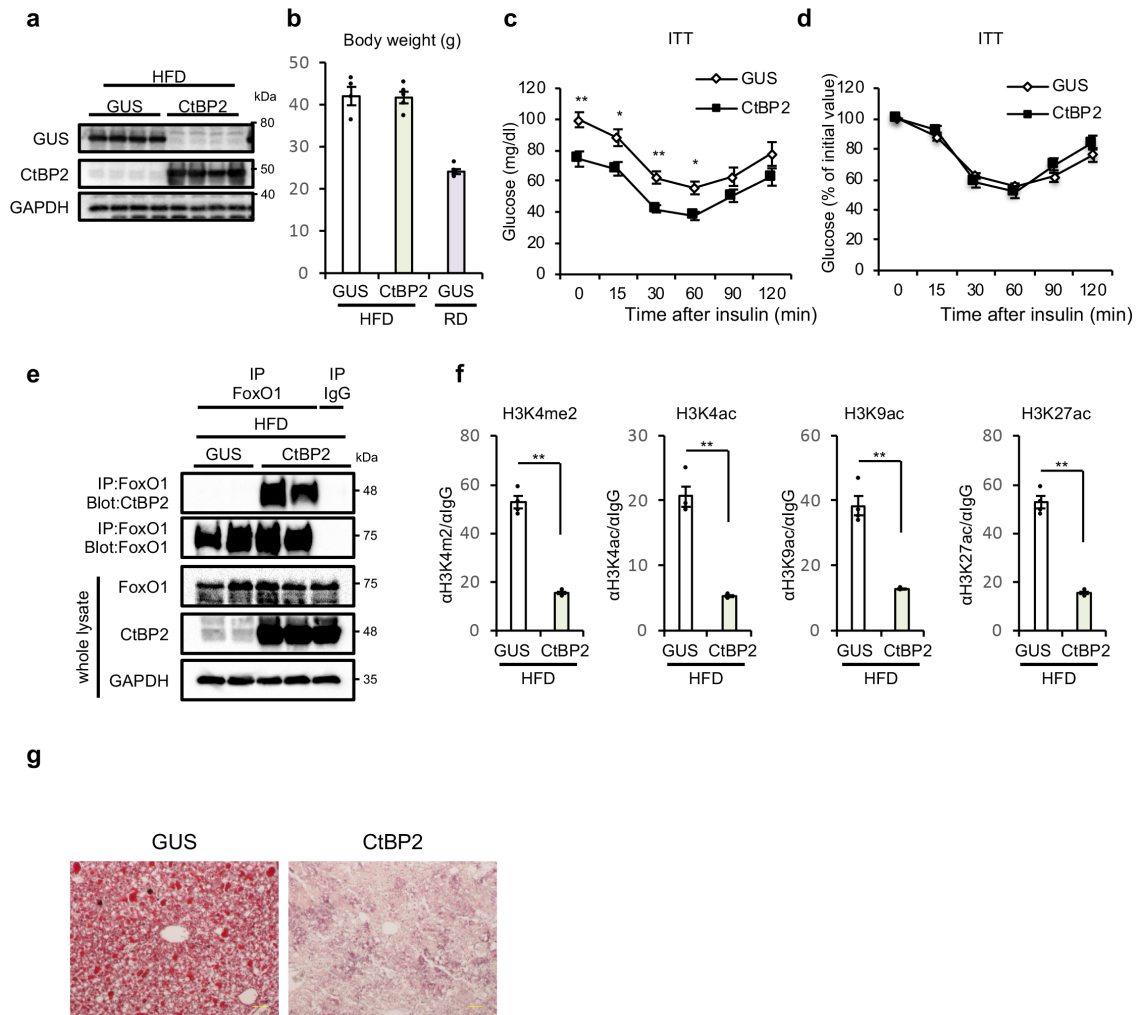

2

Supplementary Figure 7

3 **Supplementary Fig. 7. CtBP2 gain of function in the liver of obese mice.**

4 CtBP2 was exogenously expressed in the liver of diet-induced obese mice by  
 5 adenoviral transduction (AdCtBP2), along with its control (AdGUS) (**a,b,f**: an  
 6 overnight fast, **c-e,g**: 6-h fast ). **a**. GUS and CtBP2 protein expression levels in  
 7 liver. **b**. Body weights (n=4 for GUS/HFD, n=5 for CtBP2/HFD and GUS/lean,  
 8 biologically independent animals). HFD: high fat diet, RD: regular diet. **c,d**.



1 Insulin tolerance test (ITT) (n=12 for GUS and n=10 for CtBP2, biologically  
2 independent animals, normalized as % of initial values in **d**,  $p = 1.5 \times 10^{-3}$ , 0.013,  
3  $4.4 \times 10^{-3}$ , 0.025 for 0 min, 15 min, 30 min, 60 min, respectively). **e**.  
4 CtBP2/FoxO1 complex induced by exogenous CtBP2 expression (biologically  
5 independent animals). **f**. Histone modifications at *G6pc* gene promoter (n=4  
6 biologically independent animals for each group, p-values are as follows:  
7  $7.2 \times 10^{-6}$  for H3K4me2,  $6.5 \times 10^{-5}$  for H3K4ac,  $1.3 \times 10^{-4}$  for H3K9ac,  $7.3 \times 10^{-6}$  for  
8 H3K27ac). **g**. Oil Red O staining of representative sections. Yellow bars indicate  
9 100  $\mu$ m. Data are expressed as the mean  $\pm$  SEM. \*\* denotes  $p < 0.01$  evaluated  
10 by unpaired two-tailed Student's t-test. Source Data are provided as a Source  
11 Data file.  
12

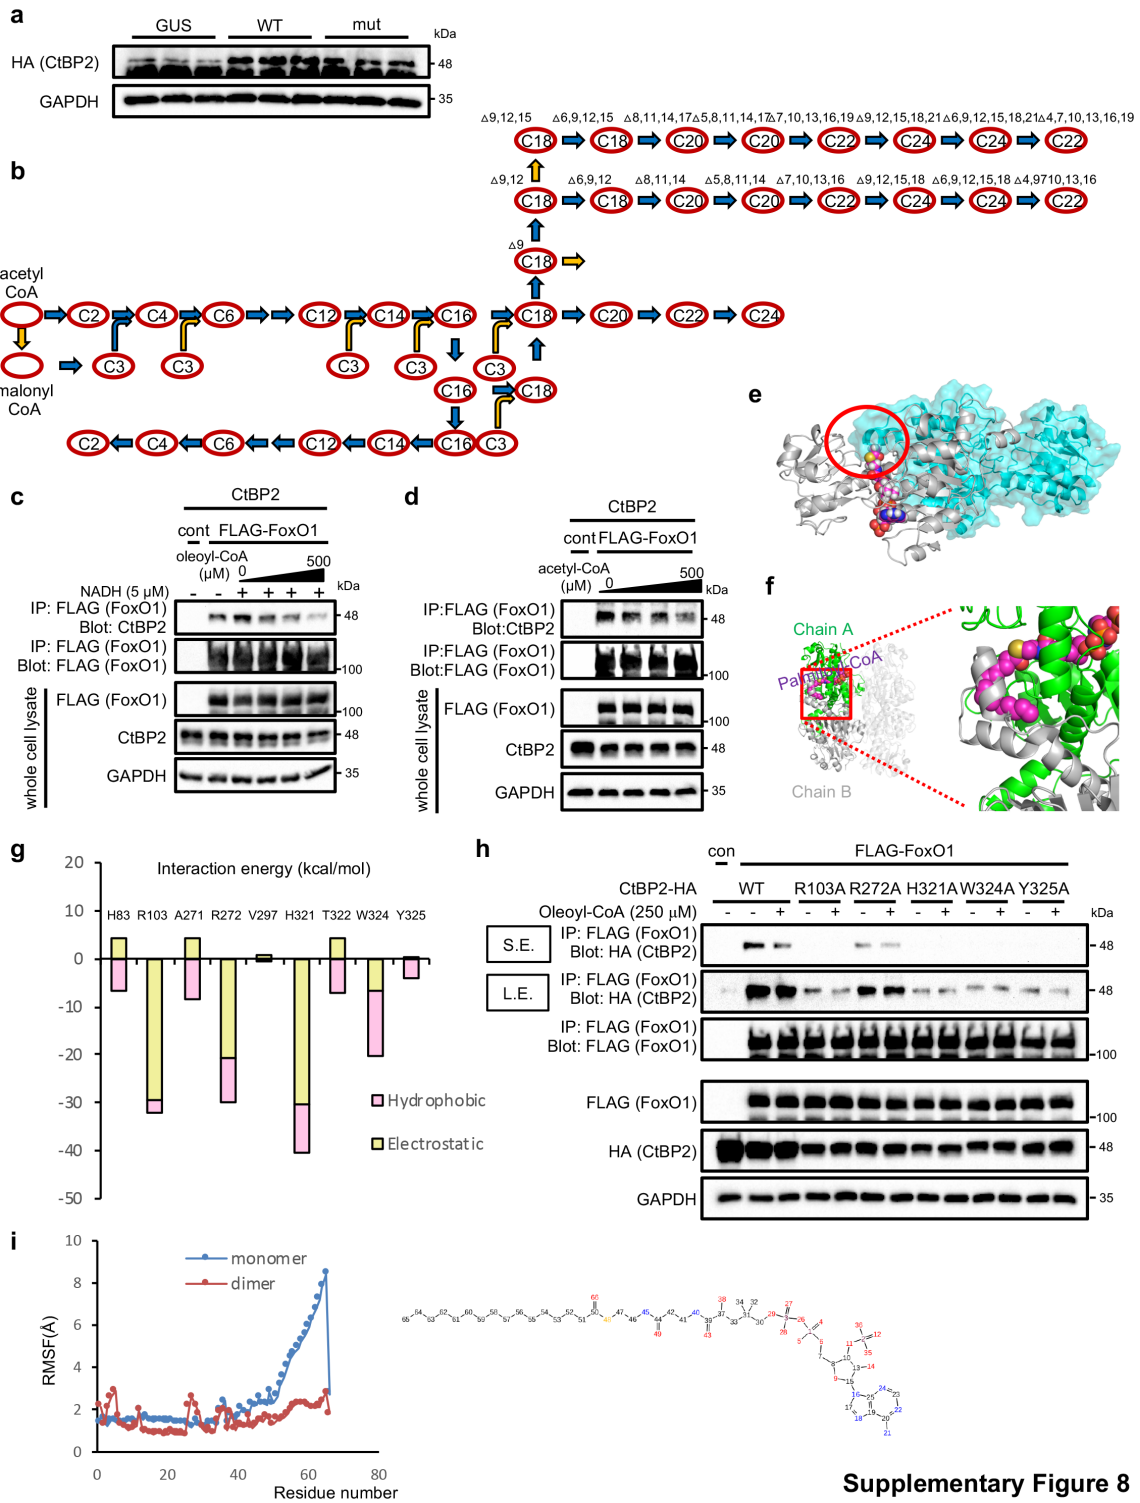

Supplementary Figure 8

1 **Supplementary Fig. 8. The structure-function relationships in CtBP2**  
2 **reveals critical coupling of metabolite-sensing with transcriptional**  
3 **regulation.**

4 **a.** The protein expression levels of exogenously expressed wild-type (WT)  
5 CtBP2 and mutant lacking its Rossmann fold pocket (mut) in Fig. 7a were  
6 analyzed by detecting HA-tag fused to these two constructs (6-h fasted). **b.**  
7 Fatty acid synthesis in KEGG pathway analysis. Blue arrows indicate decreased  
8 activity by exogenous wild-type CtBP2 expression compared to GUS and  
9 Rossmann fold-mutant CtBP2. **c.** Cell lysates were obtained from HEK293 cells  
10 expressing CtBP2 with or without FLAG-FoxO1, and the CtBP2/FoxO1 complex  
11 was detected in the presence of the indicated concentrations of NADH (0 or 5  
12  $\mu\text{M}$ ) and oleoyl-CoA (0, 50, 150, 500  $\mu\text{M}$ ). **d.** Increasing concentrations of  
13 acetyl-CoA (0, 50, 150, 500  $\mu\text{M}$ ) were added to the HEK293 lysates expressing  
14 CtBP2 and FLAG-FoxO1. **e.** Computer-assisted structural analysis of CtBP2  
15 with acetyl-CoA. Red oval indicates the protruded acyl-chain of acetyl-CoA. **f.**  
16 Magnification of the interaction site between CtBP2 and palmitoyl-CoA obtained  
17 by our in silico structural modeling. **g.** Interaction energies estimated by the first-  
18 principles calculations FMO in Fig. 7j. **h.** Key residues in CtBP2 for the  
19 interaction with palmitoyl-CoA were mutated to alanine. Wild-type CtBP2-HA  
20 (WT) or the mutants along with a control plasmid or FLAG-FoxO1 were  
21 expressed in HEK293 cells and the cell lysates were immunoprecipitated with  
22 FLAG-tag in the presence or absence of oleoyl-CoA (250  $\mu\text{M}$ ). S.E.: shorter  
23 exposure, L.E.: longer exposure. **i.** The stability of palmitoyl-CoA was evaluated  
24 with monomeric form or dimeric form of CtBP2 by MD simulation. The

1 fluctuation of the palmitoyl-CoA residues in this simulation was quantified RMSF  
2 measurement. The residue numbering of the atoms is indicated to the right of  
3 the graph. High RMSF values indicate low binding affinities for CtBP2. Source  
4 Data are provided as a Source Data file.  
5

1

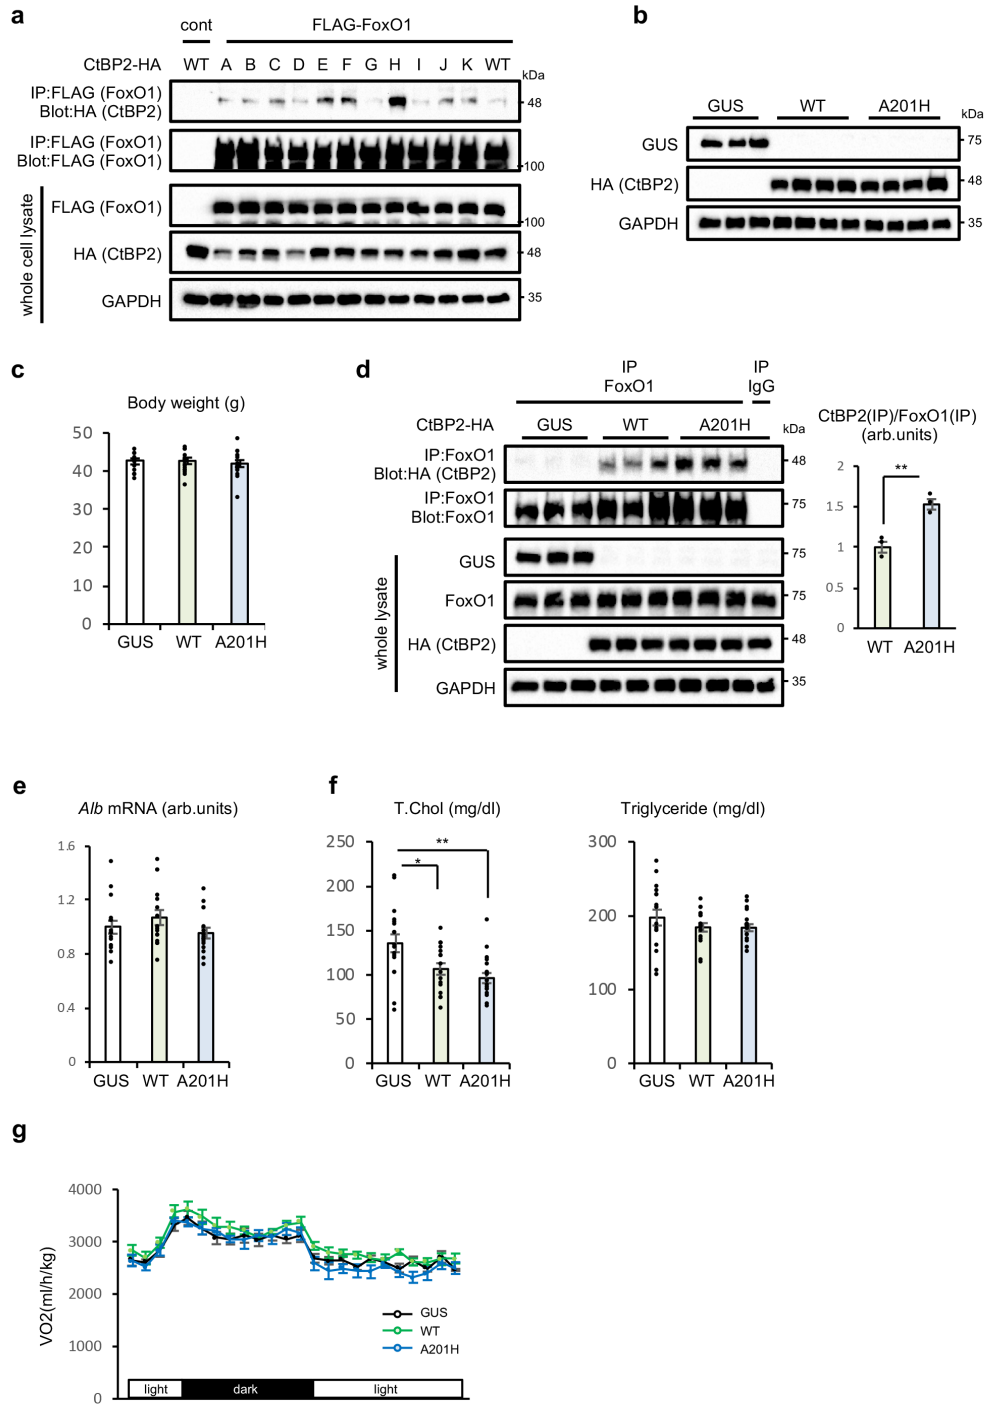

Supplementary Figure 9

2

3 **Supplementary Fig.9. Dimerization is a key step for CtBP2 activation**

1 **a.** A screen of mutations predicted to stabilize CtBP2 dimer formation. A series  
2 of CtBP2 mutants (A to K) as well as wild-type CtBP2 (WT) was expressed  
3 along with FLAG-FoxO1 in HEK293 cells and the interaction was analyzed. A:  
4 ASP136MET, B: ASP136TYR, C: ASP136HIS, D: ASN149ARG, E:  
5 GLN163TYR, F: SER164ARG, G: VAR165ARG, H: ALA201HIS, I:  
6 SER304MET, J: GLN327TYR, and K: SER330TRP. **b-g:** Adenovirus-mediated  
7 overexpression of wild-type CtBP2 (WT), ALA201HIS mutant CtBP2 (A201H)  
8 along with control (GUS) (3 days after transduction, b-f: overnight fasted). **b.**  
9 The protein expression levels in Fig. 8d-g were analyzed by detecting HA-tag  
10 fused to these two constructs. **c.** Body weights (n=15 for GUS and A201H, n=16  
11 for WT, biologically independent animals). **d.** Liver homogenates from mice  
12 (Fig. 8d-g) were subjected to co-immunoprecipitation to examine endogenous  
13 CtBP2/FoxO1 complex. The densitometric quantification is shown to the right of  
14 the blot (n=3 biologically independent animals for each group,  $p = 4.7 \times 10^{-3}$ ). **e.**  
15 The expression of *A/b* gene (n=16 for GUS and WT, n=15 for A201H,  
16 biologically independent animals). **f.** Plasma lipid profile (n=17 for GUS and WT,  
17 n=18 for A201H, biologically independent animals,  $p = 0.021$  and  $1.6 \times 10^{-3}$  for  
18 GUS vs WT and GUS vs A201H (T.Chol)). **g.** O<sub>2</sub> consumption (n=5, biologically  
19 independent animals). The dark and light phases are indicated by solid bars.  
20 Data are expressed as the mean  $\pm$  SEM. \* and \*\* denote  $p < 0.05$  and  $p < 0.01$   
21 evaluated by unpaired two-tailed Student's t-test, respectively. Source Data are  
22 provided as a Source Data file.

23

24 **Supplementary Table 1. Primer list for our qPCR.**

| <b>Gene</b>            |         | <b>Sequence</b>                |
|------------------------|---------|--------------------------------|
| <b><i>Rplp0</i></b>    | Forward | 5'-CACTGGTCTAGGACCCGAGAA-3'    |
|                        | Reverse | 5'-AGGGGGAGATGTTTCAGCATGT-3'   |
| <b><i>Pck1</i></b>     | Forward | 5'-CTGCATAACGGTCTGGACTTC-3'    |
|                        | Reverse | 5'-CAGCAACTGCCCGTACTCC-3'      |
| <b><i>G6pc</i></b>     | Forward | 5'-CGACTCGCTATCTCCAAGTGA-3'    |
|                        | Reverse | 5'-GTTGAACCAGTCTCCGACCA-3'     |
| <b><i>Foxo1</i></b>    | Forward | 5'-AACACACAGCTGGGTGTCAGG-3'    |
|                        | Reverse | 5'-GCATCTTTGGACTGCTCCTCAGT-3'  |
| <b><i>Ctbp2</i></b>    | Forward | 5'-GCAGGACTTGCTATATCAGAGCGA-3' |
|                        | Reverse | 5'-ATGCACCTTGCCTCATCTGCT-3'    |
| <b><i>Alb</i></b>      | Forward | 5'-AGACGTGTGTTGCCGATGAGT-3'    |
|                        | Reverse | 5'-GTTTTACGGAGGTTTGAATG-3'     |
| <b><i>Gpam</i></b>     | Forward | 5'-ACAGTTGGCACAATAGACGTTT-3'   |
|                        | Reverse | 5'-CCTTCCATTTTCAGTGTTGCAGA-3'  |
| <b><i>Fasn</i></b>     | Forward | 5'-AGAGATCCCGAGACGCTTCT-3'     |
|                        | Reverse | 5'-GCCTGGTAGGCATTCTGTAGT-3'    |
| <b><i>Scd1</i></b>     | Forward | 5'-CCCGGGAGAATATCCTGGTTT-3'    |
|                        | Reverse | 5'-TCGATGAAGAACGTGGTGAAGT-3'   |
| <b><i>Ppargc1a</i></b> | Forward | 5'-GAAGTGGTGTAGCGACCAATC-3'    |
|                        | Reverse | 5'-AATGAGGGCAATCCGTCTTCA-3'    |
| <b><i>Sreb1c</i></b>   | Forward | 5'-GGAGCCATGGATTGCACATT-3'     |
|                        | Reverse | 5'-GGCCCGGGAAGTCACTGT-3'       |
| <b><i>Mlxipl</i></b>   | Forward | 5'-CACTCAGGGAATACACGCCTAC-3'   |
|                        | Reverse | 5'-ATCTTGGTCTTAGGGTCTTCAGG-3'  |
| <b><i>Pklr</i></b>     | Forward | TCAAGGCAGGGATGAACATTG          |
|                        | Reverse | CACGGGTCTGTAGCTGAGTGG          |
| <b><i>Acly</i></b>     | Forward | ACCCTTTCACTGGGGATCACA          |
|                        | Reverse | GACAGGGATCAGGATTTCTTG          |
| <b><i>Crp</i></b>      | Forward | ATGGAGAAGCTACTCTGGTGCC         |
|                        | Reverse | ACACACAGTAAAGGTGTTTCAGTGGC     |
| <b><i>Cd36</i></b>     | Forward | AGATGACGTGGCAAAGAACAG          |
|                        | Reverse | CCTTGGCTAGATAACGAACTCTG        |
| <b><i>Acadm</i></b>    | Forward | AGGGTTTAGTTTTGAGTTGACGG        |
|                        | Reverse | CCCCGCTTTTGTTCATATTCCG         |
